# Supplementary material for: Protein consumption in Norwegian adults and older adults: usual intake, adequacy, and the contribution of animal and plant-based protein sources
Source: Research Square preprint supplement (doi:10.21203/rs.3.rs-7865702/v1), 2026-01-29
Supplement: Supplementary file 1 [file e6d8ef7ad4c410246d5330c0.pdf]

## Supplementary tables and figures

**Table S1.** Baseline characteristics, protein intake and protein adequacy among Norwegian adults (18-64 years) in the Norkost 4 study (2022-2023), including energy under-reporters, stratified by Protein Adequacy and Quality Score (PAQS) (median (IQR); mean).

| <i>Adults (18-64 years)</i>                                | All<br>(n=1583)        | PAQS <1<br>(n=248)     | PAQS ≥ 1<br>(n=1335)   |
|------------------------------------------------------------|------------------------|------------------------|------------------------|
| <b>Gender, % female</b>                                    | 52                     | 67                     | 50                     |
| <b>Age, years</b>                                          | 43 (31-53); 42         | 44 (33-53); 43         | 42 (31-53); 42         |
| <b>BMI, kg/m<sup>2</sup></b>                               | 24.8 (22.5-27.8); 25.5 | 28.4 (24.9-31.2); 28.6 | 24.4 (22.2-26.9); 24.9 |
| <b># of vegetarians, vegans, and/or flexitarians (%) *</b> | 60 (3.8%)              | 14 (5.6%)              | 46 (3.4%)              |
| <b>Level of physical activity, n (%)</b>                   |                        |                        |                        |
| <b>1: sedentary</b>                                        | 159 (10%)              | 35 (14%)               | 124 (9%)               |
| <b>2: at least 4 hours of movement/week</b>                | 694 (44%)              | 128 (52%)              | 566 (42%)              |
| <b>3: at least 4 hours of moderate activity/week</b>       | 563 (36%)              | 75 (30%)               | 488 (37%)              |
| <b>4: strenuous activity multiple times/week</b>           | 163 (10%)              | 9 (4%)                 | 154 (12%)              |
| <b>Energy intake, megajoules/day</b>                       | 8.7 (6.7-11.4); 9.3    | 6.4 (4.6-8.1); 6.7     | 9.2 (7.1-11.7); 9.8    |
| <b>BMR-factor**</b>                                        | 1.3 (1.0-1.6); 1.3     | 0.9 (0.8-1.1); 1.0     | 1.4 (1.1-1.6); 1.4     |
| <b>Crude protein intake, E%</b>                            | 17.2 (14.7-20.1); 17.7 | 14.8 (12.3-17.4); 15.3 | 17.5 (15.1-20.4); 18.1 |
| <b>Of which plant protein, %</b>                           | 33.3 (24.9-42.8); 35.3 | 39.0 (30.2-52.3); 43.0 | 32.4 (24.3-41.4); 33.9 |
| <b>Crude protein intake, g/kg/d</b>                        | 1.1 (0.9-1.4); 1.2     | 0.7 (0.6-0.7); 0.6     | 1.2 (1.0-1.5); 1.3     |
| <b>Digestible protein intake, g/kg/d</b>                   | 1.1 (0.8-1.3); 1.1     | 0.6 (0.5-0.7); 0.6     | 1.1 (0.9-1.4); 1.2     |
| <b>Weighted digestibility of daily protein intake</b>      | 0.90 (0.88-0.92); 0.92 | 0.89 (0.87-0.93); 0.94 | 0.90 (0.88-0.92); 0.92 |
| <b>PAQS</b>                                                | 1.5 (1.1-1.9); 1.6     | 0.8 (0.7-0.9); 0.8     | 1.6 (1.3-2.0); 1.7     |

\* Number of individuals that reported that they were vegan, vegetarian, or flexitarian at the time of the survey.

\*\* Degree of activity during free time in the past 12 months.

\*\*\* Ratio of estimated energy intake (MJ/d): basal metabolic rate calculated according to self-reported weight, height, and age.

**Table S2.** Baseline characteristics, protein intake and protein adequacy among Norwegian older adults (65-80 years) in the Norkost 4 study (2022-2023), including energy under-reporters, stratified by Protein Adequacy and Quality Score (PAQS) (median (IQR); mean).

| <b>Older adults (≥65 years)</b>                            | All<br>(n=514)         | PAQS <1<br>(n=91)      | PAQS ≥ 1<br>(n=423)    |
|------------------------------------------------------------|------------------------|------------------------|------------------------|
| <b>Gender, % female</b>                                    | 49                     | 74                     | 45                     |
| <b>Age, years</b>                                          | 72 (69-75); 72         | 74 (68-77); 73         | 72 (69-75); 72         |
| <b>BMI, kg/m<sup>2</sup></b>                               | 25.0 (22.8-27.5); 25.5 | 24.6 (22.7-26.3); 24.8 | 25.0 (22.9-28.1); 25.6 |
| <b># of vegetarians, vegans, and/or flexitarians (%) *</b> | 4 (0.8%)               | 1 (1.1%)               | 3 (0.7%)               |
| <b>Level of physical activity, n (%)</b>                   |                        |                        |                        |
| <b>1: sedentary</b>                                        | 60 (12%)               | 20 (22%)               | 40 (10%)               |
| <b>2: at least 4 hours of movement/week</b>                | 291 (57%)              | 47 (52%)               | 244 (58%)              |
| <b>3: at least 4 hours of moderate activity/week</b>       | 155 (30%)              | 22 (24%)               | 133 (31%)              |
| <b>4: strenuous activity multiple times/week</b>           | 6 (1%)                 | 0 (0%)                 | 6 (1%)                 |
| <b>Energy intake, megajoules/day</b>                       | 8.4 (6.8-10.0); 8.6    | 6.3 (5.2-7.1); 6.2     | 8.9 (7.3-10.3); 9.1    |
| <b>BMR-factor***</b>                                       | 1.3 (1.1-1.6); 1.3     | 1.3 (1.0-1.5); 1.3     | 1.3 (1.1-1.6); 1.3     |
| <b>Crude protein intake, E%</b>                            | 16.7 (14.7-19.5); 17.3 | 14.0 (12.3-16.8); 14.6 | 17.2 (15.4-20.0); 17.9 |
| <b>Of which plant protein, %</b>                           | 32.2 (25.0-41.1); 33.6 | 40.0 (32.2-48.9); 41.0 | 31.0 (24.6-37.9); 32.0 |
| <b>Crude protein intake, g/kg/d</b>                        | 1.1 (0.9-1.4); 1.2     | 0.7 (0.6-0.8); 0.7     | 1.2 (1.0-1.4); 1.3     |
| <b>Digestible protein intake, g/kg/d</b>                   | 1.0 (0.8-1.2); 1.0     | 0.6 (0.5-0.7); 0.6     | 1.0 (0.9-1.3); 1.1     |
| <b>Weighted digestibility of protein intake</b>            | 0.89 (0.88-0.90); 0.89 | 0.88 (0.86-0.90); 0.88 | 0.90 (0.88-0.91); 0.89 |
| <b>PAQS</b>                                                | 1.4 (1.1-1.8); 1.5     | 0.8 (0.7-0.9); 0.8     | 1.5 (1.3-1.9); 1.6     |

\* Number of individuals that reported that they were vegan, vegetarian, or flexitarian at the time of the survey.

\*\* Degree of activity during free time in the past 12 months.

\*\*\* Ratio of estimated energy intake (MJ/d): basal metabolic rate calculated according to self-reported weight, height, and age.

**Table S3.** Fecal digestibility factors for 30 food groups, from Heerschop et al. (22).

| <b>Food group name</b>    | <b>Digestibility factor</b> |
|---------------------------|-----------------------------|
| Ungrouped                 | 1                           |
| Potatoes                  | 0.55                        |
| Alcohol                   | 0.65                        |
| Bread                     | 0.9                         |
| Eggs                      | 0.97                        |
| Fruits                    | 0.76                        |
| Pastry                    | 0.9                         |
| Cereals                   | 0.7                         |
| Vegetables                | 0.65                        |
| Spreads                   | 0.9                         |
| Sauces animal-based       | 0.9                         |
| Sauces plant-based        | 0.65                        |
| Sauces mixed              | 0.9                         |
| Snacks animal-based       | 0.9                         |
| Snacks plant-based        | 0.65                        |
| Cheese                    | 0.95                        |
| Spices                    | 0.65                        |
| Dairy                     | 0.95                        |
| Beverages                 | 0.65                        |
| Nuts                      | 0.75                        |
| Legumes                   | 0.75                        |
| Clinical formulas         | 0.9                         |
| Sweets                    | 0.8                         |
| Fats plant-based          | 0.65                        |
| Fats mixed                | 0.9                         |
| Fish                      | 0.9                         |
| Meat                      | 0.95                        |
| Substitutes               | 0.94                        |
| Miscellaneous plant-based | 0.65                        |
| Miscellaneous mixed       | 0.9                         |

**Figure S1.** Prevalence of inadequate protein intake among Norwegian adults (age 18 to 64) and older adults (age 65 to 80), including and excluding energy under-reporters. Inadequacy was calculated according to crude protein intake, digestible protein intake, and the Protein Adequacy and Quality Score (PAQS), according to an Estimated Average Requirement (EAR) of 0.66 g/kg/day.

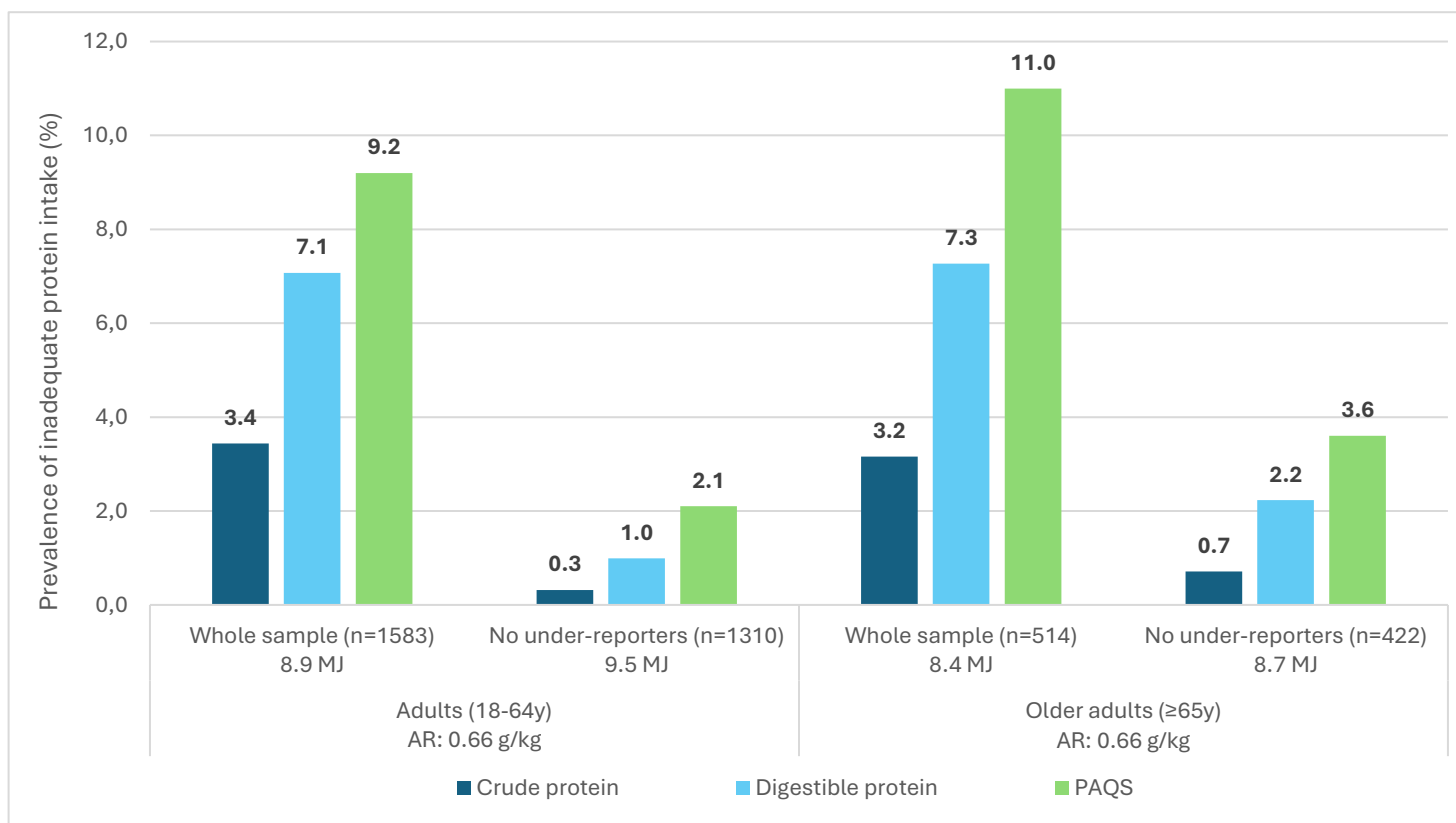

PAQS was calculated by taking the sum of digestible amino acids per meal after considering amino acid digestibility, amino acid requirements, and crude amino acid intake. Prevalences were estimated by the Statistical Program to Assess usual Dietary Exposure (SPADE), which models usual intake distributions and removes within-person variations, and subsequently applies the EAR cut-point method using an Estimated Average Requirement (EAR) of 0.66 g/kg/d.
